# Supplementary material for: Long Noncoding RNA LINC00578 Inhibits Ferroptosis in Pancreatic Cancer via Regulating SLC7A11 Ubiquitination
Source: Hindawi journal article supplement (doi:10.1155/2023/1744102), 2023-02-14
Supplement: f1 [file 1744102.f1.pdf]

A

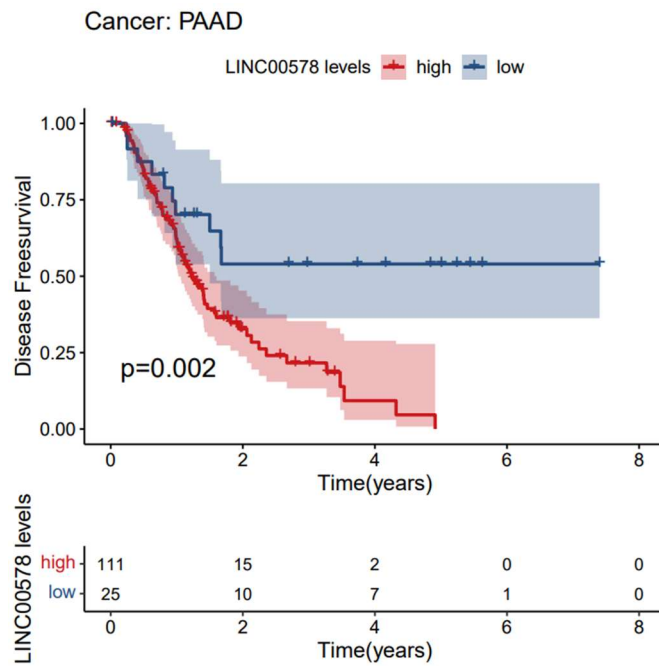

Figure S1. Kaplan-Meier analysis of the correlation of LINC00578 expression with disease-free survival (DFS) ( $P = 0.002$ ), from cBioportal (TCGA Firehose Legacy) cohort.

A

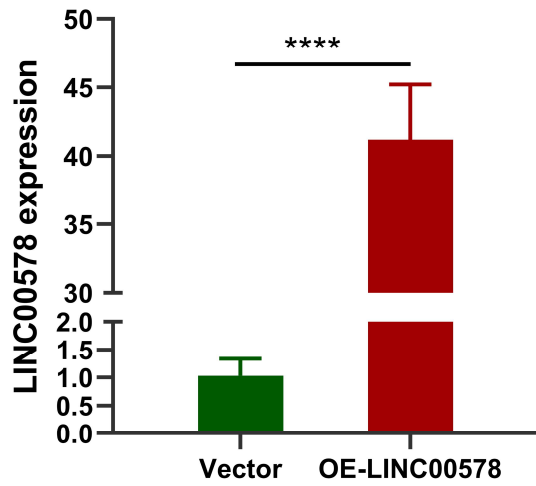

B

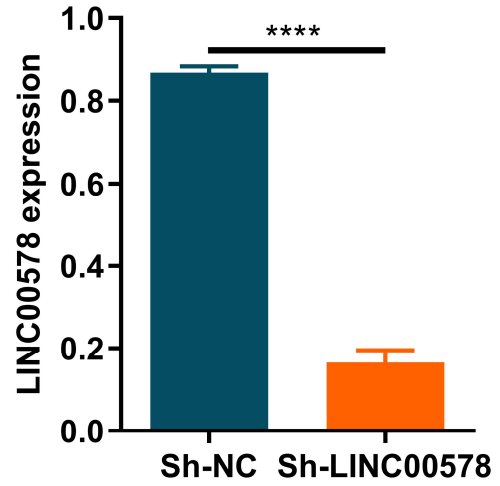

Figure S2. Relative expression levels of LINC00578 in PATU8988 cells with LINC00578 overexpression and PL45 cells with LINC00578 knockdown.

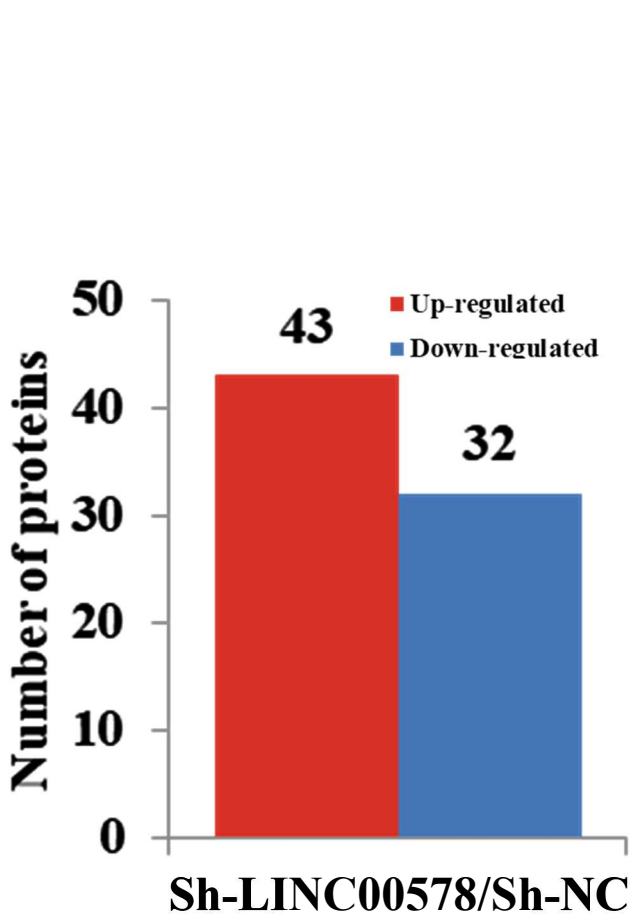

| Down-regulated    |           |             | Up-regulated      |           |             |
|-------------------|-----------|-------------|-------------------|-----------|-------------|
| Protein accession | Gene name | KD/NC Ratio | Protein accession | Gene name | KD/NC Ratio |
| Q8TDN6            | BRIX1     | 0.637       | Q9Y5Y2            | NUBP2     | 1.571       |
| O60925            | PFDN1     | 0.629       | Q13907            | IDI1      | 1.513       |
| P51571            | SSR4      | 0.55        | Q12907            | LMAN2     | 1.656       |
| Q5BJD5            | TMEM41B   | 0.604       | Q92925            | SMARCD2   | 1.941       |
| Q4G0N4            | NADK2     | 0.614       | Q13228            | SELENBP1  | 1.717       |
| P18077            | RPL35A    | 0.562       | Q7Z4H8            | POGLUT3   | 1.594       |
| P29317            | EPHA2     | 0.567       | P68363            | TUBA1B    | 1.516       |
| Q9Y295            | DRG1      | 0.521       | Q07960            | ARHGAP1   | 1.594       |
| P11717            | IGF2R     | 0.552       | Q9BW72            | HIGD2A    | 2.145       |
| Q9UH99            | SUN2      | 0.524       | Q14353            | GAMT      | 1.519       |
| P02794            | FTH1      | 0.522       | Q8N4Q1            | CHCHD4    | 1.692       |
| Q9BZK7            | TBL1XR1   | 0.547       | P51153            | RAB13     | 2.268       |
| O15031            | PLXNB2    | 0.511       | P18858            | LIG1      | 1.782       |
| Q9P1Y5            | CAMSAP3   | 0.654       | Q8TDP1            | RNASEH2C  | 1.837       |
| P62888            | RPL30     | 0.497       | P58107            | EPPK1     | 2.003       |
| P25440            | BRD2      | 0.623       | Q86Y39            | NDUFA11   | 1.635       |
| Q02750            | MAP2K1    | 0.661       | Q92817            | EVPL      | 1.677       |
| P42330            | AKR1C3    | 0.646       | Q8NFV4            | ABHD11    | 1.821       |
| P45880            | VDAC2     | 0.553       | Q7Z3T8            | ZFYVE16   | 1.782       |
| Q13347            | EIF3I     | 0.577       | P33993            | MCM7      | 1.554       |
| Q9Y277            | VDAC3     | 0.574       | P54105            | CLNS1A    | 1.519       |
| Q9H8H3            | METTL7A   | 0.594       | P04062            | GBA       | 1.751       |
| Q99873            | PRMT1     | 0.618       | Q9C005            | DPY30     | 1.797       |
| Q9Y3A5            | SBDS      | 0.531       | Q9H3G5            | CPVL      | 1.809       |
| P57076            | CFAP298   | 0.407       | P61024            | CKS1B     | 1.509       |
| P63172            | DYNLT1    | 0.577       | P84103            | SRSF3     | 1.509       |
| O43291            | SPINT2    | 0.589       | Q96199            | SUCLG2    | 2.086       |
| Q7Z3J2            | VPS35L    | 0.601       | Q95299            | NDUFA10   | 1.608       |
| P11166            | SLC2A1    | 0.576       | Q7Z5L9            | IRF2BP2   | 1.618       |
| P62873            | GNB1      | 0.558       | Q14257            | RCN2      | 1.656       |
| Q9UHG3            | PCYOX1    | 0.66        | P62081            | RPS7      | 1.604       |
| Q9BSH5            | HDHD3     | 0.625       | Q96K17            | BTF3L4    | 1.681       |
|                   |           |             | Q9NX40            | OCIAD1    | 1.532       |
|                   |           |             | Q5T6F2            | UBAP2     | 1.594       |
|                   |           |             | Q9NRZ9            | HELLS     | 1.692       |
|                   |           |             | P61970            | NUTF2     | 1.509       |
|                   |           |             | A3KMH1            | VWA8      | 1.736       |
|                   |           |             | P61960            | UFM1      | 1.959       |
|                   |           |             | Q14232            | EIF2B1    | 1.558       |
|                   |           |             | P43405            | SYK       | 1.567       |
|                   |           |             | Q9NZL4            | HSPBP1    | 1.587       |
|                   |           |             | Q9BWD1            | ACAT2     | 1.509       |
|                   |           |             | P08397            | HMBS      | 2.058       |

Figure S3. Differential expressed proteins between Sh-LINC00578 and Sh-NC groups selected by Label-free proteomics

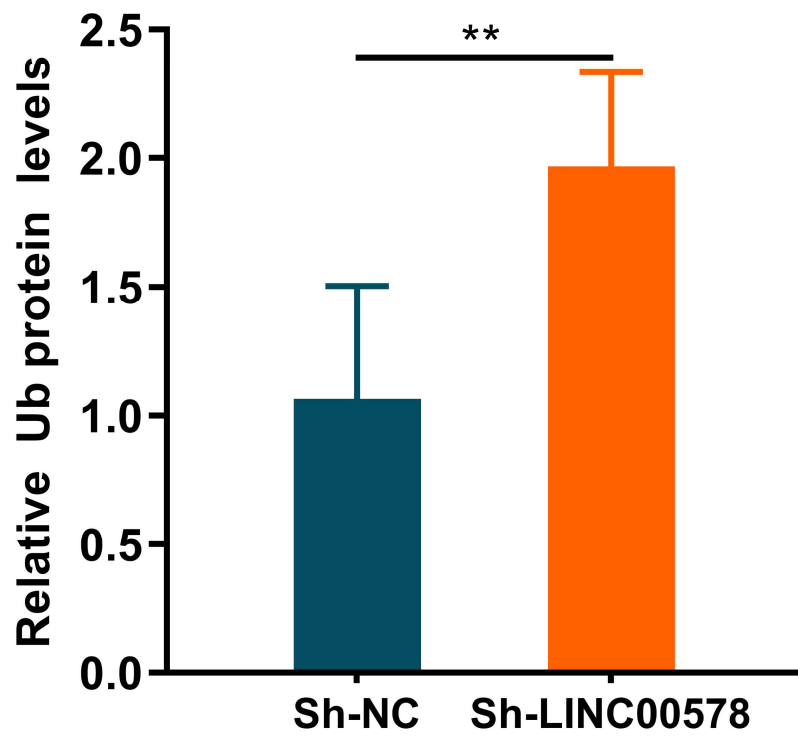

Figure S4. Relative ubiquitinated protein levels between Sh-LINC00578 and Sh-NC groups by coimmunoprecipitation
